# Supplementary material for: Impact of Intracranial Volume and Brain Volume on the Prognostic Value of Computed Tomography Perfusion Core Volume in Acute Ischemic Stroke
Source: MDPI journal article supplement (doi:10.3390/jcdd11030080), 2024-02-28
Supplement: s1 [file s1]

## **SUPPPLEMENTAL MATERIAL**

**Supplemental Table I. Multivariable analysis of improved functional outcome (mRS) at 90 days.** ASPECTS, Alberta Stroke Program Early CT Score; intravenous alteplase; mRS, modified Rankin Scale; NIHSS, National Institutes of Health Stroke Scale; aOR, adjusted Odds Ratio.

| Variables                               |                                  | aOR(95% CI)       | P value | Log-likelihood | Nagelkerke’s R² | β      |
|-----------------------------------------|----------------------------------|-------------------|---------|----------------|-----------------|--------|
| CTP ischemic core volume (per IQR [mL]) |                                  | 0.48 (0.33-0.69)  | <0.001  |                |                 | -0.21  |
|                                         | Age (per year)                   | 0.97 (0.95-0.99)  | 0.002   |                |                 | -0.03  |
|                                         | Male gender                      | 1.71 (0.97-3.04)  | 0.07    |                |                 | 0.54   |
|                                         | Onset-to-groin time (per minute) | 1.00 (0.99-1.00)  | 0.10    |                |                 | -0.002 |
|                                         | NIHSS at baseline (per point)    | 0.96 (0.92-1.01)  | 0.14    |                |                 | -0.04  |
|                                         | Pre-stroke mRS                   | 0.55 (0.42-0.71)  | <0.001  |                |                 | -0.59  |
|                                         | IVT administration               | 0.81 (0.43-1.153) | 0.52    |                |                 | -0.21  |
|                                         |                                  |                   |         | -284.46        | 0.51            |        |
| ICV <sub>core</sub> (per IQR [%])       |                                  | 0.51 (0.39-0.69)  | <0.001  |                |                 | -0.29  |
|                                         | Age (per year)                   | 0.97 (0.95-0.99)  | 0.002   |                |                 | -0.03  |
|                                         | Male gender                      | 1.63 (0.93-2.89)  | 0.09    |                |                 | 0.49   |
|                                         | Onset-to-groin time (per minute) | 1.00 (0.99-1.00)  | 0.10    |                |                 | -0.002 |
|                                         | NIHSS at baseline (per point)    | 0.96 (0.93-1.01)  | 0.14    |                |                 | -0.04  |
|                                         | Pre-stroke mRS                   | 0.55 (0.42-0.71)  | <0.001  |                |                 | -0.59  |
|                                         | IVT administration               | 0.81 (0.43-1.53)  | 0.52    |                |                 | -0.21  |
|                                         |                                  |                   |         | -284.63        | 0.51            |        |
| TBV <sub>core</sub> (per IQR [%])       |                                  | 0.50 (0.38-0.67)  | <0.001  |                |                 | -0.24  |
|                                         | Age (per year)                   | 0.97 (0.95-0.99)  | 0.002   |                |                 | -0.03  |
|                                         | Male gender                      | 1.65 (0.94-2.91)  | 0.09    |                |                 | 0.50   |
|                                         | Onset-to-groin time (per minute) | 1.00 (0.99-1.00)  | 0.09    |                |                 | -0.002 |
|                                         | NIHSS at baseline (per point)    | 0.96 (0.92-1.01)  | 0.14    |                |                 | -0.04  |
|                                         | Pre-stroke mRS                   | 0.55 (0.42-0.72)  | <0.001  |                |                 | -0.59  |
|                                         | IVT administration               | 0.81 (0.43-1.53)  | 0.52    |                |                 | -0.21  |
|                                         |                                  |                   |         | -284.21        | 0.52            |        |

**Supplemental Table II. Multivariable analysis of functional independence (mRS 0-2).** ASPECTS, Alberta Stroke Program Early CT Score; IVT, intravenous alteplase; mRS, modified Rankin Scale; NIHSS, National Institutes of Health Stroke Scale; aOR , adjusted Odds Ratio.

| Variables                               |                                  | aOR(95% CI)             | P value          | Log-likelihood | Tjur’s R² | β      |
|-----------------------------------------|----------------------------------|-------------------------|------------------|----------------|-----------|--------|
| CTP ischemic core volume (per IQR [mL]) |                                  | <b>0.34 (0.16-0.70)</b> | <b>0.001</b>     |                |           | -0.30  |
|                                         | Age (per year)                   | <b>0.94 (0.91-0.97)</b> | <b>&lt;0.001</b> |                |           | -0.06  |
|                                         | Male gender                      | 2.09 (0.94-4.75)        | 0.07             |                |           | 0.74   |
|                                         | Onset-to-groin time (per minute) | 1.00 (1.00-1.00)        | 0.4              |                |           | -0.001 |
|                                         | NIHSS at baseline (per point)    | 0.97 (0.90-1.04)        | 0.3              |                |           | -0.04  |
|                                         | <b>Pre-stroke mRS</b>            | <b>0.38 (0.22-0.60)</b> | <b>&lt;0.001</b> |                |           | -0.96  |
|                                         | IVT administration               | 0.84 (0.34-2.02)        | 0.7              |                |           | -0.17  |
|                                         |                                  |                         |                  | -79.05         | 0.41      |        |
| ICV <sub>core</sub> (per IQR [%])       |                                  | <b>0.36 (0.19-0.65)</b> | <b>0.002</b>     |                |           | -0.41  |
|                                         | Age (per year)                   | <b>0.94 (0.91-0.97)</b> | <b>&lt;0.001</b> |                |           | -0.06  |
|                                         | Male gender                      | 1.93 (0.87-4.34)        | 0.1              |                |           | 0.68   |
|                                         | Onset-to-groin time (per minute) | 1.00 (1.00-1.00)        | 0.4              |                |           | -0.001 |
|                                         | NIHSS at baseline (per point)    | 0.97 (0.90-1.04)        | 0.3              |                |           | -0.04  |
|                                         | <b>Pre-stroke mRS</b>            | <b>0.38 (0.22-0.60)</b> | <b>&lt;0.001</b> |                |           | -0.96  |
|                                         | IVT administration               | 0.84 (0.34-2.03)        | 0.7              |                |           | -0.17  |
|                                         |                                  |                         |                  | -79.35         | 0.41      |        |
| TBV <sub>core</sub> (per IQR [%])       |                                  | <b>0.35 (0.17-0.63)</b> | <b>0.002</b>     |                |           | -0.34  |
|                                         | Age (per year)                   | <b>0.94 (0.91-0.97)</b> | <b>&lt;0.001</b> |                |           | -0.06  |
|                                         | Male gender                      | 1.94 (0.87-4.36)        | 0.1              |                |           | 0.66   |
|                                         | Onset-to-groin time (per minute) | 1.00 (1.00-1.00)        | 0.4              |                |           | -0.001 |
|                                         | NIHSS at baseline (per point)    | 0.97 (0.90-1.04)        | 0.3              |                |           | -0.03  |
|                                         | <b>Pre-stroke mRS</b>            | <b>0.38 (0.22-0.60)</b> | <b>&lt;0.001</b> |                |           | -0.96  |
|                                         | IVT administration               | 0.84 (0.34-2.03)        | 0.7              |                |           | -0.17  |
|                                         |                                  |                         |                  | -79.17         | 0.41      |        |
